# Supplementary material
Source: MDPI journal article supplement (https://www.mdpi.com/2227-9040/11/5/286)
Supplement: s1 [file s1]

# A Highly Sensitive and Selective Near-Infrared Fluorescent Probe for Detecting Peroxynitrite in Living Cells and *Drosophila* Brains

Wei Wang, Jian-Bin Deng, Long Jin and Bai-Ou Guan\*

Guangdong Provincial Key Laboratory of Optical Fiber Sensing and Communication, Institute of Photonics Technology, Jinan University, Guangzhou 511443, China;  
wangwei\_0415@jnu.edu.cn (W.W.); dengjianbin@stu2020.jnu.edu.cn (J.-B.D.);  
tjinlong@jnu.edu.cn (L.J.)

\* Correspondence: tguanbo@jnu.edu.cn; Tel: +86-20-37337012

## Contents

|                                                  |    |
|--------------------------------------------------|----|
| 1. Experimental Details.....                     | 2  |
| 2. Synthesis Details and Characterizations ..... | 3  |
| 3. Figures S1–S12.....                           | 4  |
| 4. NMR and HRMS Spectra.....                     | 11 |
| References.....                                  | 13 |

## 1. Experimental Details

### 1.1. Reagents

1, 6-dihydroxynaphthalene was purchased from Shanghai Yien Chemical Technology Ltd. (Shanghai, China); methyl sulfonic acid and phthalic anhydride were purchased from Energy Chemical; *N*, *N*-dimethylformamide (DMF) and potassium carbonate were purchased from Aladdin; dimethyl sulfoxide (DMSO), manganese dioxide, ethylene diamine tetraacetic acid, and ferrous sulfate were purchased from Meryer; dipotassium hydrogen phosphate and potassium phosphate were purchased from Macklin; sodium nitrite was purchased from TCI; hydrogen peroxide (30%) was purchased from Guangzhou Guangtry Reagent Technology Ltd. (Guangzhou, China); glutathione (GSH), cysteine (Cys), homocysteine (Hcy), glucose (Glu), xanthine, 2-(4-(bromomethyl) phenyl)-4,4,5,5-tetramethyl-1,3,2-dioxaborolane, and sodium hypochlorite were purchased from Shanghai Bide Pharmaceutical Technology Co., Ltd. (Shanghai, China); xanthine oxidase and 3-(aminopropyl)-1-hydroxy-3-isopropyl-2-oxo-1-triazene (NOC-5) were purchased from Sigma-Aldrich (St. Louis, MO, USA); superoxide dismutase was purchased from Shanghai Yuanye Biotechnology Co., Ltd. (Shanghai, China); 3-morpholinopyridine hydrochloride (SIN-1) was purchased from Glpbio. All the solvents and reagents were commercial without further purification.

Peroxynitrite ( $\text{ONOO}^-$ ) was prepared following the method reported in the literature [1]. In a nutshell, a mixture of sodium nitrite ( $\text{NaNO}_2$ , 0.6 M) and hydrogen peroxide ( $\text{H}_2\text{O}_2$ , 0.7 M) was acidified with hydrochloric acid (HCl, 0.6 M) and sodium hydroxide (NaOH, 1 M) was added right away to render the solution alkaline. Manganese dioxide was used to remove the hydrogen peroxide. The concentration of  $\text{ONOO}^-$  was determined by UV analysis at 302 nm with an extinction coefficient of  $1670 \text{ M}^{-1}\text{cm}^{-1}$ . Aliquots of the solution were stored at  $-20^\circ\text{C}$ .  $\cdot\text{OH}$  was generated by the Fenton reaction ( $\text{Fe}^{2+} + \text{H}_2\text{O}_2$ ), in which EDTA was used to avoid the precipitation of  $\text{Fe}^{2+}$  and  $\text{Fe}^{2+}$  concentration represented the  $\cdot\text{OH}$  concentrations [2]. NO was provided by donor 3-(aminopropyl)-1-hydroxy-3-isopropyl-2-oxo-1-triazene (NOC-5, 100  $\mu\text{M}$ ).  $\text{O}_2^{\cdot-}$  was created by the enzymatic reaction of xanthine/xanthine oxidase (XA/XO; 6.0  $\mu\text{M}$ /3 mU) at  $25^\circ\text{C}$  for 5 min [3]. The  $^1\text{O}_2$  was generated by reaction (100  $\mu\text{M}$   $\text{H}_2\text{O}_2$  + 500  $\mu\text{M}$   $\text{OCI}^-$ ). Other materials were used as received from commercial sources unless otherwise indicated. Ultrapure water was used throughout.

### 1.2. Apparatus

Absorption spectra were recorded with a UV-visible spectrophotometer (Techcomp, UV2310). Fluorescence measurements were measured on a spectrometer (Ocean Insight, QE Pro-Raman) with a  $1 \times 10 \text{ mm}$  quartz cell at the slits of 5 nm, excited by a xenon lamp source (Zolix, Gloria-X150A). Images of the cells were taken on laser confocal microscope (Leica, SP8). Cell viability was tested by ELIASA (TECAN, SPARK 10M). Images of *Drosophila* brains were taken with a fluorescent stereomicroscope (Mshot, MZX81).  $^1\text{H}$  NMR and  $^{13}\text{C}$  NMR spectra were recorded on a Bruker 600MHZ spectrometer with  $\text{CDCl}_3$  (TMS as internal standard) or  $\text{DMSO}-d_6$ . HRMS spectra were taken on a high-resolution mass spectrometer (Sciex, AB SCIEX 500R).

## 2. Synthesis Details and Characterizations

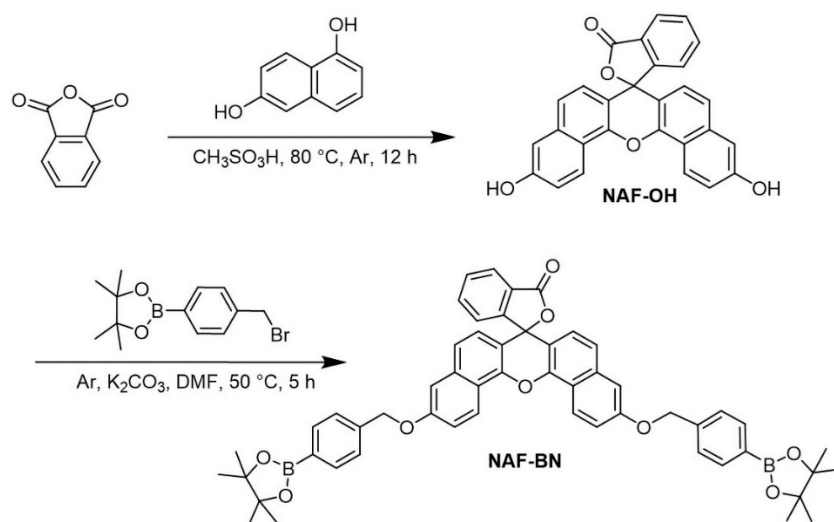

**Scheme 1.** Synthetic route of NAF-OH and NAF-BN.

### 2.1. Synthesis of NAF-OH

**NAF-OH** was synthesized according to the literature [4]. 1,6-dihydroxynaphthalene (6.25 g, 39 mmol) and phthalic anhydride (2.67 g, 18 mmol) were dissolved in 40 mL methanesulfonic acid stirred at  $80\text{ }^\circ\text{C}$  under argon. After 12 h, the reaction mixture was diluted with 400 mL ice-water and the crude product was obtained by decompression filtration. The crude material was purified by flash chromatography (ethyl acetate: petroleum ether = 1:1), a deep red solid was obtained (2.45 g, yield = 31%).  $^1\text{H}$  NMR (600 MHz,  $\text{DMSO}-d_6$ )  $\delta$  10.17 (s, 2H), 8.68 (d,  $J$  = 9.0 Hz, 2H), 8.09 (d,  $J$  = 6.9 Hz, 1H), 7.84–7.68 (m, 2H), 7.45 (d,  $J$  = 8.7 Hz, 2H), 7.36 (dd,  $J$  = 9.0, 2.4 Hz, 2H), 7.30 (d,  $J$  = 6.8 Hz, 1H), 7.20 (d,  $J$  = 2.4 Hz, 2H), 6.70 (d,  $J$  = 8.7 Hz, 2H).  $^{13}\text{C}$  NMR (151 MHz,  $\text{DMSO}-d_6$ )  $\delta$ : 168.90, 157.38, 153.26, 146.08, 135.97, 135.84, 130.33, 125.81, 124.81, 124.24, 124.00, 123.82, 122.67, 119.34, 117.32, 109.46, 109.43, 83.27. HRMS (ESI):  $m/z$ , calculated for  $\text{C}_{28}\text{H}_{17}\text{O}_5$ , 433.1076  $[\text{M}+\text{H}]^+$ , found: 433.1065.

### 2.2. Synthesis of NAF-BN

**NAF-OH** (100 mg, 0.234 mmol),  $\text{K}_2\text{CO}_3$  (95.9 mg, 0.694 mmol), and 2-(4-(bromomethyl)phenyl)-4,4,5,5-tetramethyl-1,3,2-dioxaborolane (206 mg, 0.694 mmol) were dissolved in 5 mL dry DMF, stirred for 10 min, then reacted at  $50\text{ }^\circ\text{C}$  for 5 h. The mixture was then diluted with 30 mL ethyl acetate and washed with water and brine. The organic layer was dried with anhydrous sodium sulfate ( $\text{Na}_2\text{SO}_4$ ) and filtered. The filtrate was concentrated under reduced pressure and purified by flash chromatography (ethyl acetate: petroleum ether = 1:2), a yellow solid was obtained (80 mg, yield = 40%).  $^1\text{H}$  NMR (600 MHz,  $\text{CDCl}_3$ )  $\delta$  8.66 (d,  $J$  = 9.1 Hz, 2H), 8.13–8.05 (m, 1H), 7.86 (d,  $J$  = 7.5 Hz, 4H), 7.63 (d,  $J$  = 5.7, 3.0 Hz, 2H), 7.50 (d,  $J$  = 7.6 Hz, 4H), 7.45 (d,  $J$  = 9.1, 2.5 Hz, 2H), 7.37 (d,  $J$  = 8.6 Hz, 2H), 7.21 (d,  $J$  = 2.5 Hz, 2H), 7.16–7.08 (m, 1H), 6.80 (d,  $J$  = 8.7 Hz, 2H), 5.24 (s, 4H), 1.35 (s, 24H).  $^{13}\text{C}$  NMR (151 MHz,  $\text{CDCl}_3$ )  $\delta$ : 169.72, 158.29, 154.11, 146.73, 139.61, 135.94, 135.12, 135.04, 129.72, 126.63, 126.50, 126.05, 125.03, 124.63, 124.10, 123.86, 122.86, 119.40, 119.16, 110.67, 107.73, 83.86, 70.05, 65.30, 24.87. HRMS (ESI):  $m/z$ , calculated for  $\text{C}_{53}\text{H}_{51}\text{B}_2\text{O}_9$ , 865.3719  $[\text{M}+\text{H}]^+$ , found: 865.3716.

### 3. Figures S1–S12

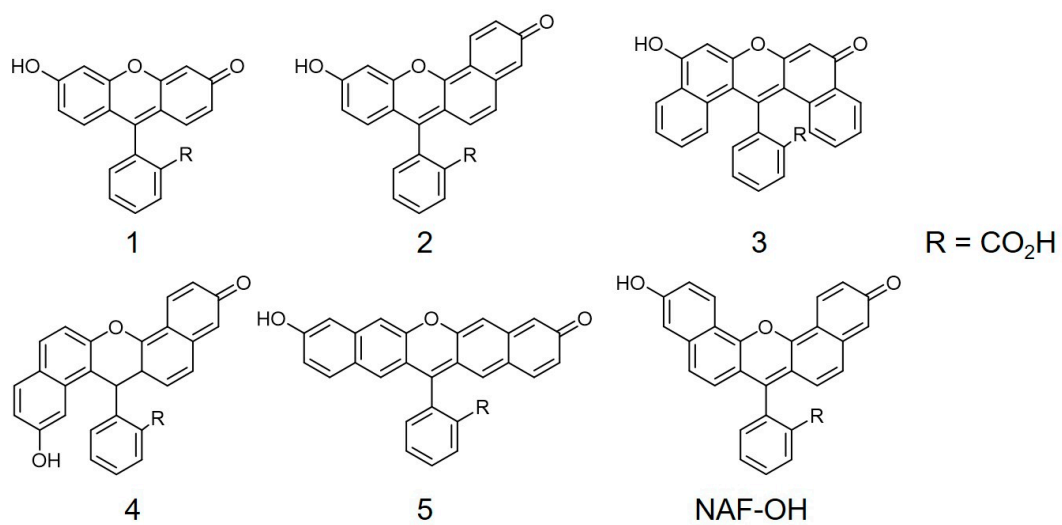

| compound | $\lambda_{\text{abs, max}}$ (nm) | $\lambda_{\text{em, max}}$ (nm) | pK <sub>a</sub> |
|----------|----------------------------------|---------------------------------|-----------------|
| 1        | 491                              | 513                             | 6.33±0.04       |
| 2        | 538                              | 629                             | 7.76±0.04       |
| 3        | 534                              | 565                             | 6.02±0.04       |
| 4        | 610                              | 674                             | >8              |
| 5        | 708                              | 790                             | >8              |
| NAF-OH   | 595                              | 670                             | 7.99±0.02       |

**Figure S1.** Structures and properties of naphthofluoresceins.

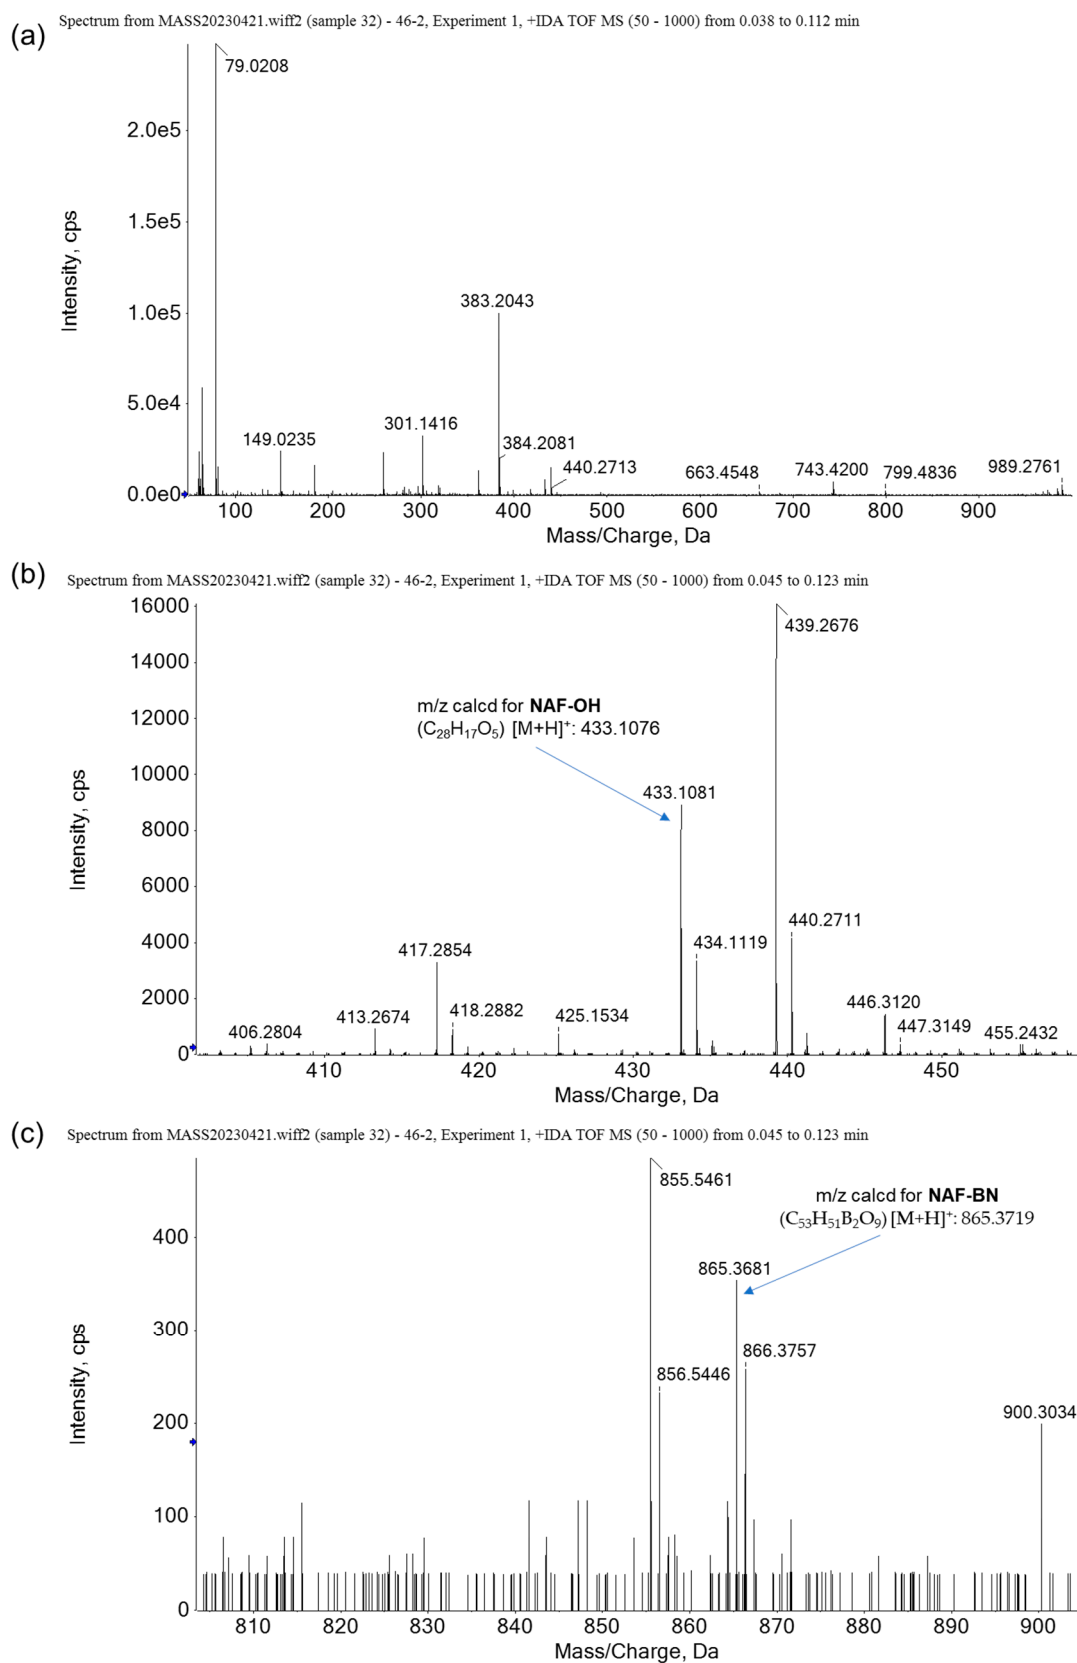

**Figure S2.** HRMS spectrum of **NAF-BN** (5  $\mu$ M) after 15 min of reaction with  $ONOO^-$  (100  $\mu$ M), (a) full spectrum, (b) the spectrum of  $m/z = 400-460$ , (c) the spectrum of  $m/z = 810-900$ .

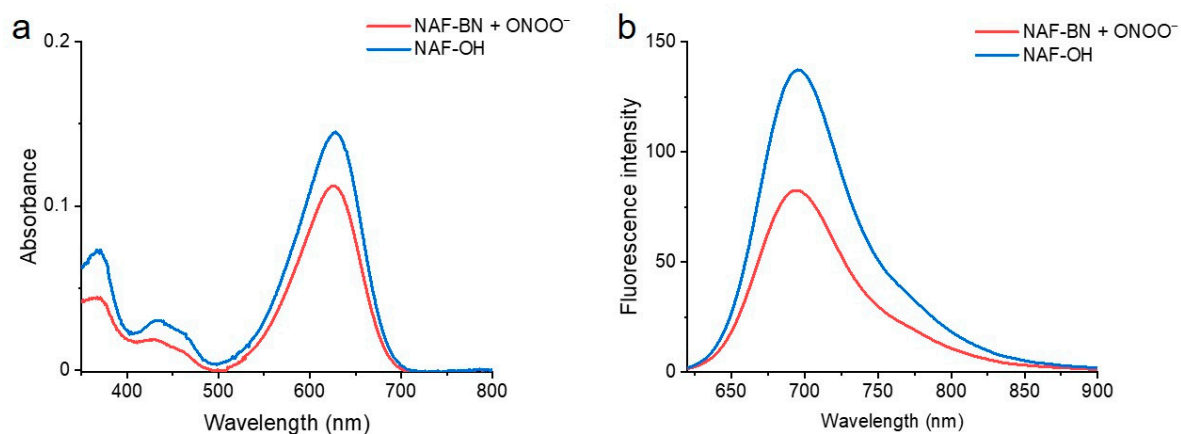

**Figure S3.** Absorption (a) and fluorescence spectra (b) of **NAF-OH** (blue line; 5  $\mu$ M) and **NAF-BN** (5  $\mu$ M) after reaction with ONOO<sup>-</sup> (100  $\mu$ M) for 15 min (red line) in phosphate buffer (100 mM PB, pH 7.4, with 50% DMSO).  $\lambda_{\text{ex}}$  = 600 nm; slits = 5 nm/5 nm.

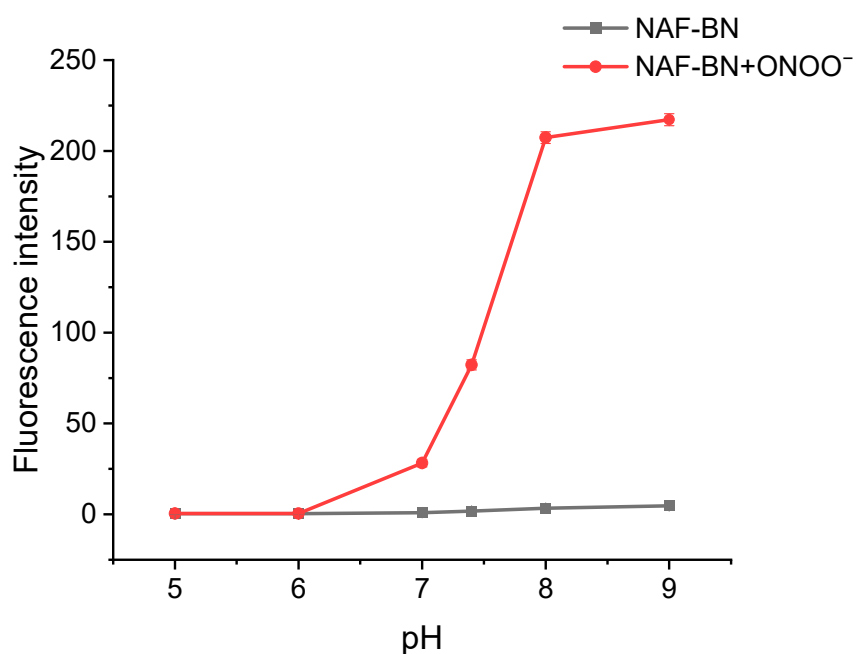

**Figure S4.** Effect of different pH values on the fluorescence of **NAF-BN** (5  $\mu$ M) or **NAF-BN** (5  $\mu$ M) with ONOO<sup>-</sup> (100  $\mu$ M) after 1 h in phosphate buffer (100 mM PB, pH 7.4, with 50% DMSO).  $\lambda_{\text{ex}}$  = 600 nm,  $\lambda_{\text{em}}$  = 695 nm.

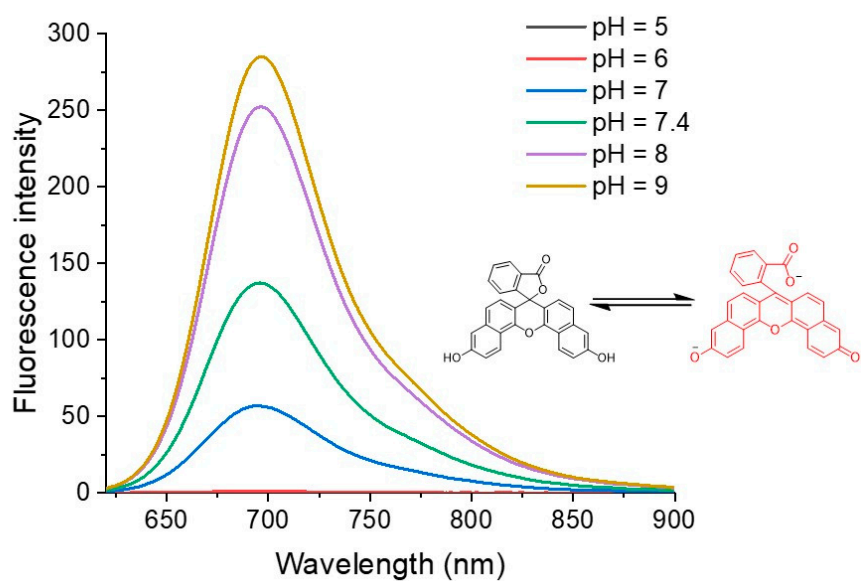

**Figure S5.** Fluorescence spectra of NAF-OH (5  $\mu\text{M}$ ) at different pH values,  $\lambda_{\text{ex}}$  = 600 nm,  $\lambda_{\text{em}}$  = 695 nm.

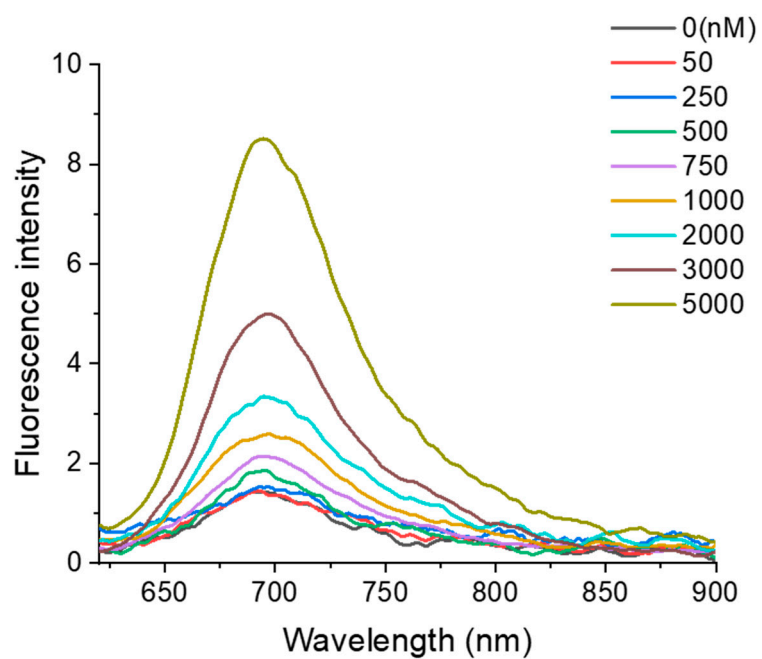

**Figure S6.** Fluorescence response to NAF-BN (5  $\mu\text{M}$ ) with different concentrations of  $\text{ONOO}^-$  for 15 min,  $\lambda_{\text{ex}}$  = 600 nm,  $\lambda_{\text{em}}$  = 695 nm.

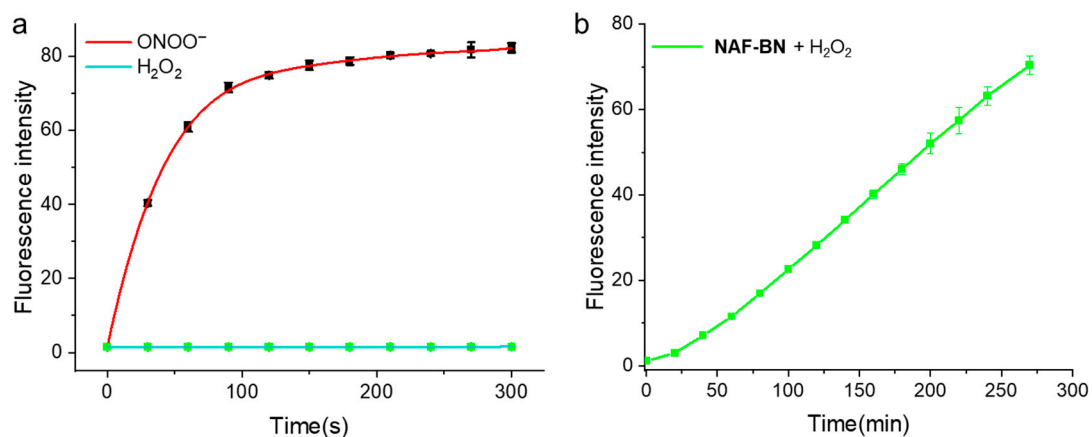

**Figure S7.** (a) Reaction of NAF-BN (5  $\mu\text{M}$ ) with  $\text{ONOO}^-$  (100  $\mu\text{M}$ ) or  $\text{H}_2\text{O}_2$  (100  $\mu\text{M}$ ); fluorescence intensity at 695 nm versus time (0–300 s). (b) Reaction of NAF-BN (5  $\mu\text{M}$ ) with  $\text{H}_2\text{O}_2$  (100  $\mu\text{M}$ ); fluorescence intensity at 695 nm versus time (0–300 min).  $\lambda_{\text{ex}} = 600 \text{ nm}$ ,  $\lambda_{\text{em}} = 695 \text{ nm}$ .

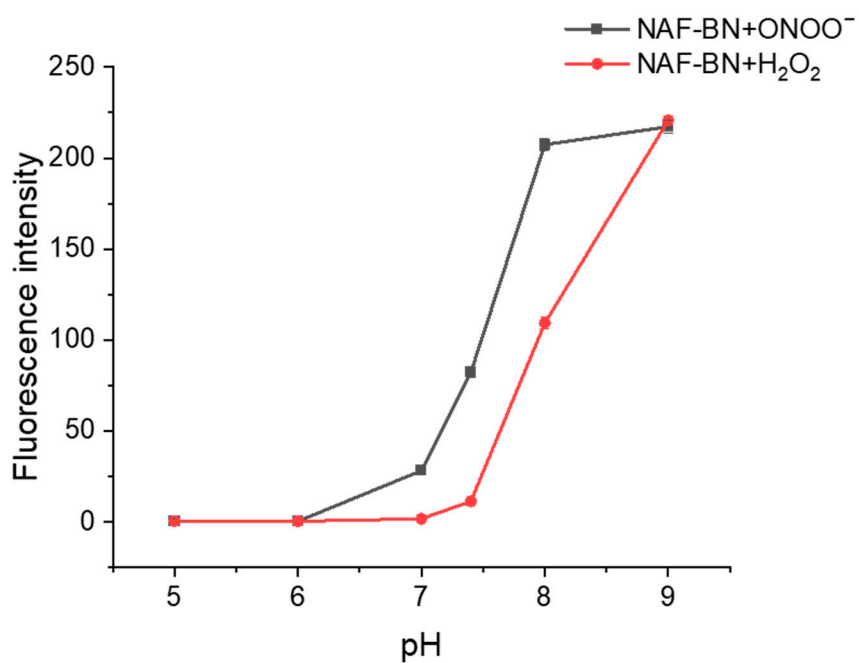

**Figure S8.** Effect of different pH values on the fluorescence of NAF-BN (5  $\mu\text{M}$ ) after reaction with  $\text{ONOO}^-$  (100  $\mu\text{M}$ ) or  $\text{H}_2\text{O}_2$  (100  $\mu\text{M}$ ) after 1 h in phosphate buffer (100 mM PB, pH 7.4, with 50% DMSO).  $\lambda_{\text{ex}} = 600 \text{ nm}$ ,  $\lambda_{\text{em}} = 695 \text{ nm}$ .



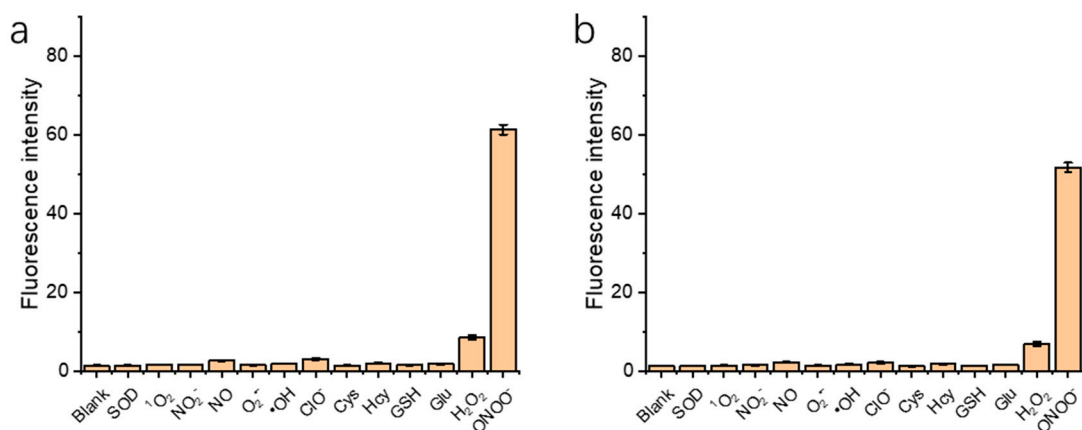

**Figure S9.** Fluorescence response to **NAF-BN** and different analytes for 15 min:  $\text{ClO}^-$ ,  $\cdot\text{O}_2^-$ ,  $\text{NO}_2^-$ , NO,  $\text{O}_2^{\cdot-}$ ,  $\cdot\text{OH}$ , Cys, Hcy, GSH, glucose,  $\text{H}_2\text{O}_2$  (1 mM); ONOO $^-$  (100  $\mu\text{M}$ ); and SOD (50 U/mL). All experiments were performed in phosphate buffer (100 mM PB, pH 7.4, with 50% DMSO); the concentration of **NAF-BN** was 5  $\mu\text{M}$ ;  $\lambda_{\text{ex}}$  = 600 nm; slits = 5 nm/5 nm. (a) Acetonitrile/PB, 1/1, (b) 1,4-dioxane/PB, 1/1.

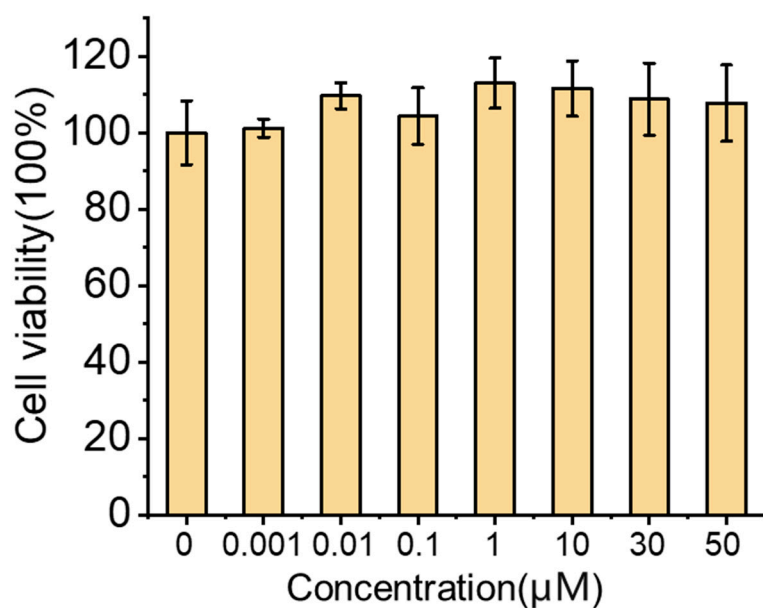

**Figure S10.** Cell viability of 4T1 cells incubated with different concentrations of **NAF-BN**, as assessed by CCK-8 assays (incubation time 24 h).

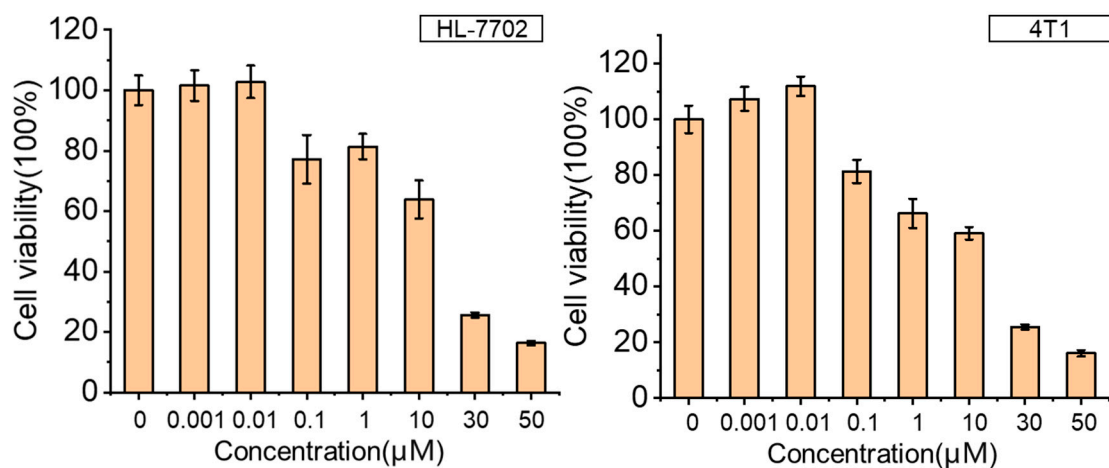

**Figure S11.** Cell viability of HL-7702 and 4T1 cells incubated with different concentrations of NAF-OH, as assessed by CCK-8 assays (incubation time 24 h).

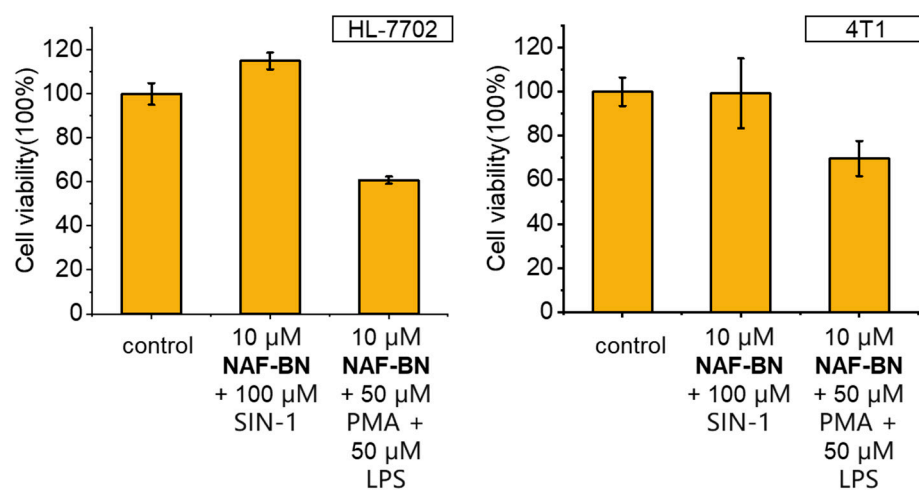

**Figure S12.** Cell viability of HL-7702 and 4T1 cells incubated with NAF-BN and SIN-1 or NAF-BN and PMA/LPS, as assessed by CCK-8 assays (incubation time 24 h).

## 4. NMR and HRMS Spectra

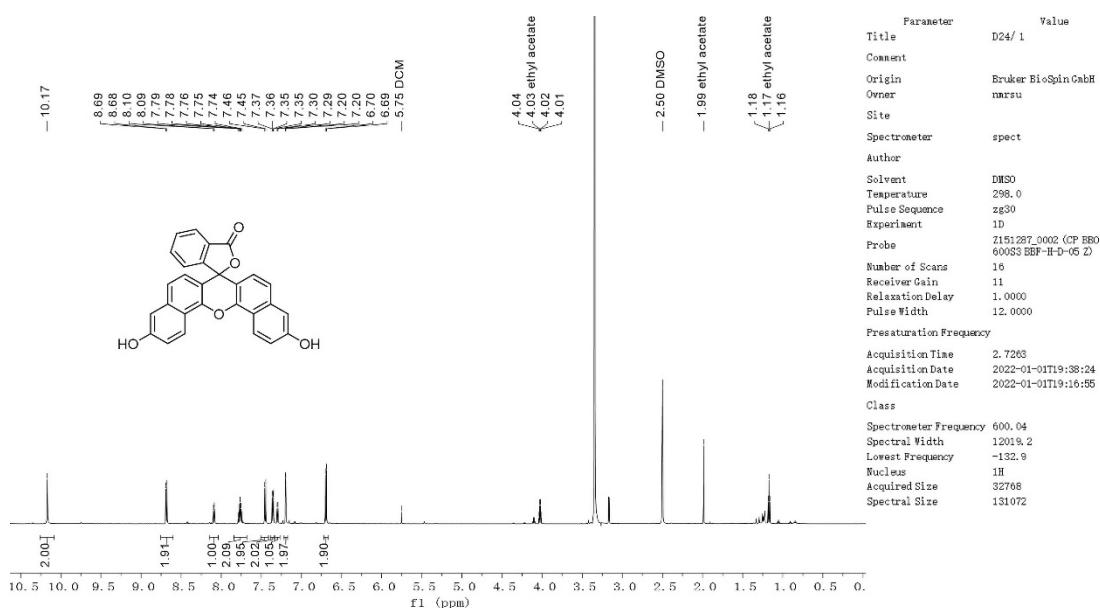

Figure S13. <sup>1</sup>H NMR spectrum of NAF-OH.

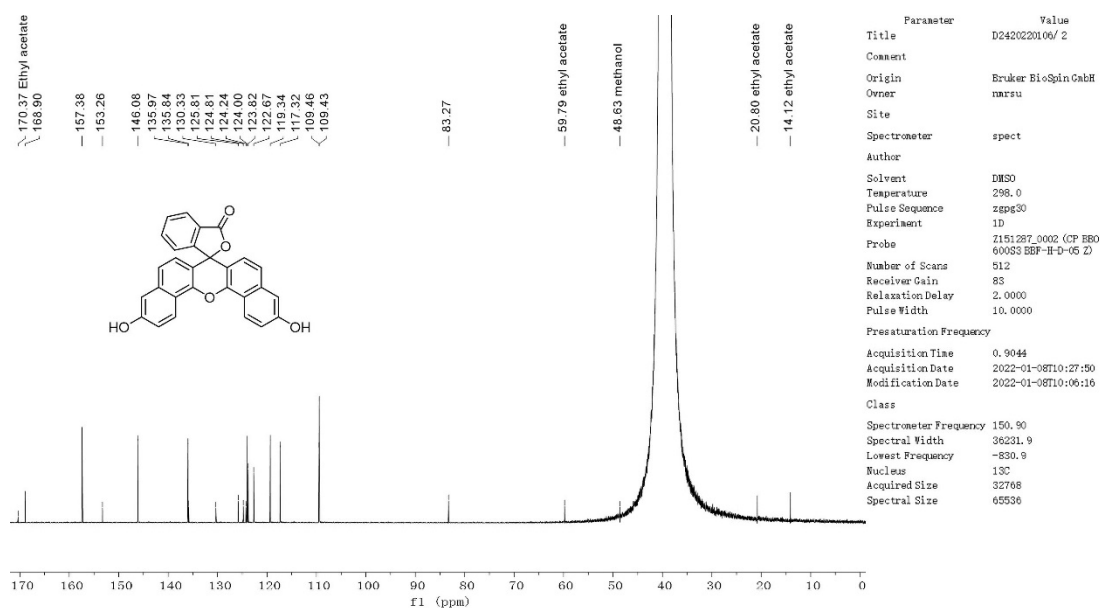

Figure S14. <sup>13</sup>C NMR spectrum of NAF-OH.

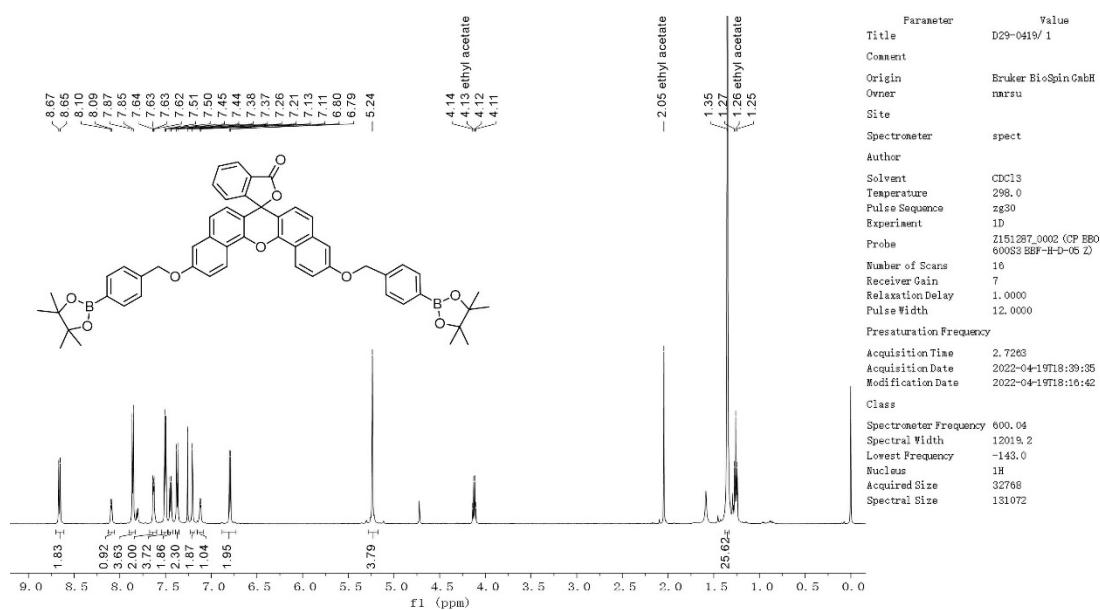

Figure S15. <sup>1</sup>H NMR spectrum of NAF-BN.

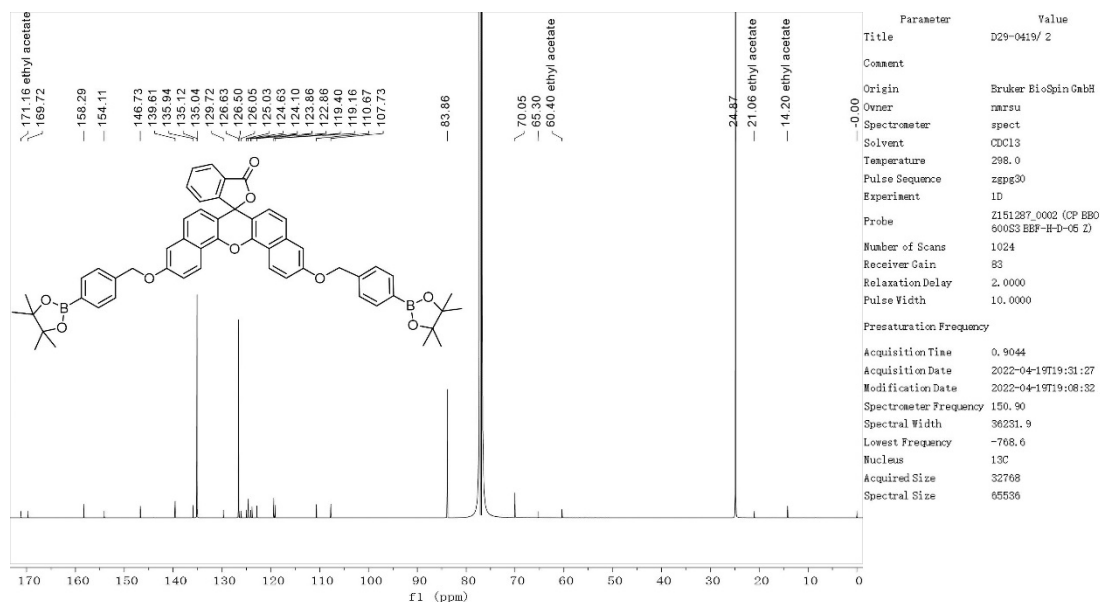

Figure S16. <sup>13</sup>C NMR spectrum of NAF-BN.

Spectrum from MASS2023013.wifi2 (sample 23) – NAF-OH, +TOF MS (50 - 1000) from 0.116 to 0.162 min

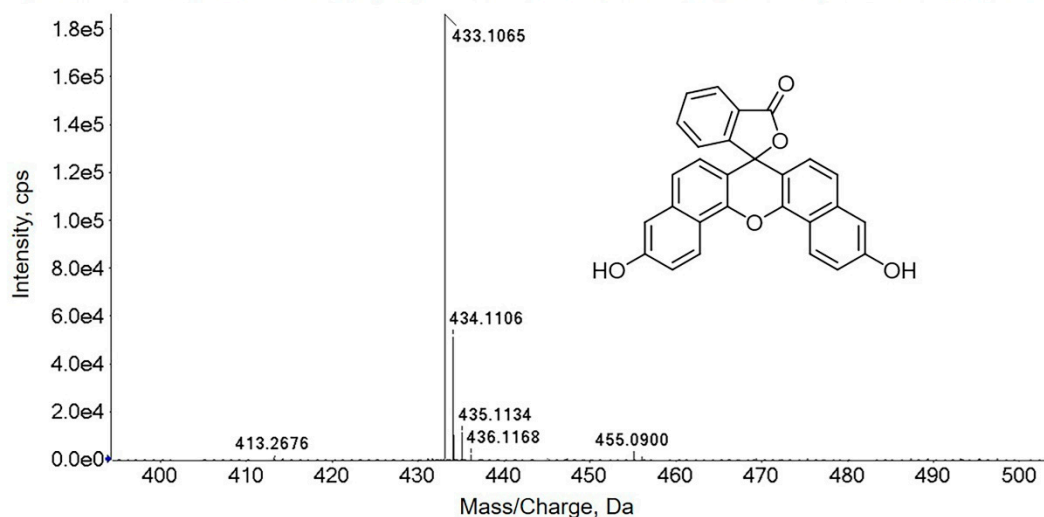

Figure S17. HRMS spectrum of NAF-OH.

Spectrum from MASS20220423.wifi2 (sample 19) – D29, +TOF MS (50 - 1000) from 0.039 to 0.093 min

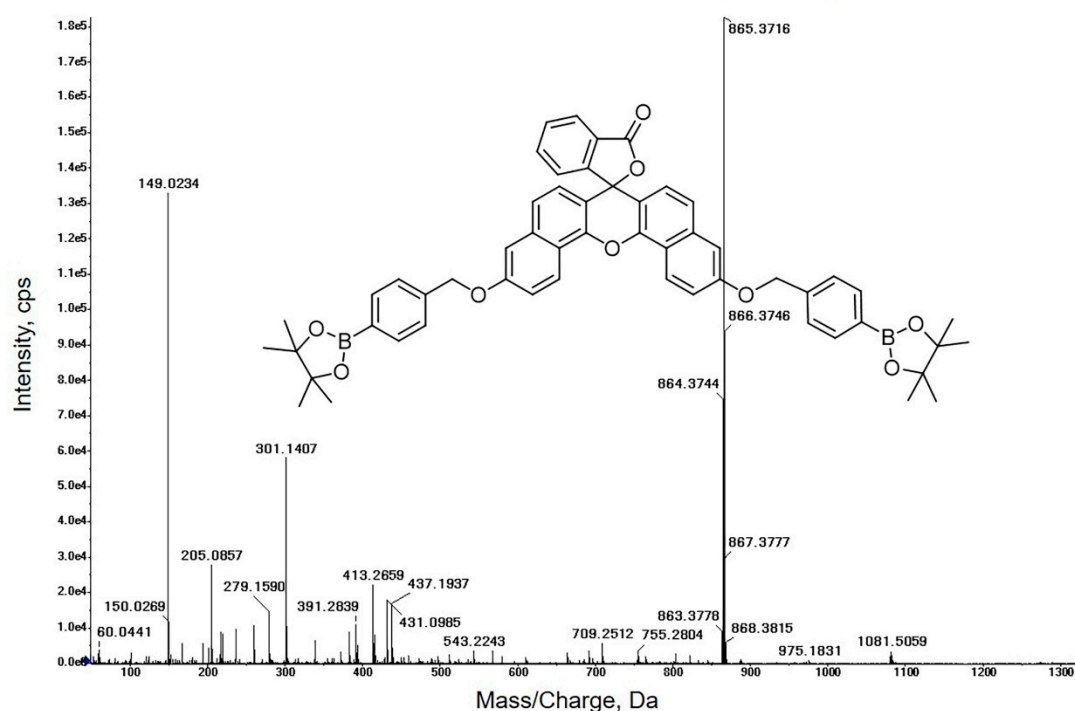

Figure S18. HRMS spectrum of NAF-BN.

## References

1. Sun, Q.; Xu, J.; Ji, C.; Shaibani, M.S.S.; Li, Z.; Lim, K.; Zhang, C.; Li, L.; Liu, Z. Ultrafast Detection of Peroxynitrite in Parkinson's Disease Models Using a near-Infrared Fluorescent Probe. *Anal. Chem.* **2020**, *92*, 4038–4045. <https://doi.org/10.1021/acs.analchem.9b05599>.
2. Li, H.; Shi, W.; Li, X.; Hu, Y.; Fang, Y.; Ma, H. Ferroptosis Accompanied by  $\cdot\text{OH}$  Generation and Cytoplasmic Viscosity Increase Revealed Via Dual-Functional Fluorescence Probe. *J Am Chem Soc* **2019**, *141*, 18301–18307. doi:10.1021/jacs.9b09722.
3. Massey, V.; Komai, H.; Palmer, G.; Elion, G.B. On the Mechanism of Inactivation of Xanthine Oxidase by Allopurinol and Other Pyrazolo[3,4-D]Pyrimidines. *J Biol Chem* **1970**, *245*, 2837–2844. doi:10.1016/s0021-9258(18)63065-0.
4. Suo, F.T.; Chen, X.W.; Fang, H.X.; Gong, Q.Y.; Yu, C.M.; Yang, N.D.; Li, S.; Wu, Q.; Li, L.; Huang, W. Hybrid Fluorophores-Based Fluorogenic Paper Device for Visually High-Throughput Detection of  $\text{Cu}^{2+}$  in Real Samples. *Dyes Pigm* **2019**, *170*, 107639. doi:10.1016/j.dyepig.2019.107639.
